# Supplementary material for: Evaluation of Vitamin D Metabolism in Patients with Type 1 Diabetes Mellitus in the Setting of Cholecalciferol Treatment
Source: MDPI journal article supplement (doi:10.3390/nu12123873), 2020-12-18
Supplement: s1 [file s1]

## **SUPPORTING INFORMATION**

## Contents

|                                                                                                      |   |
|------------------------------------------------------------------------------------------------------|---|
| S1. UPLC-MS/MS method for vitamin D <sub>3</sub> metabolites quantification .....                    | 3 |
| Table S1. MRM transitions used for detection of the vitamin D metabolites .....                      | 3 |
| S2. Method validation against DEQAS data .....                                                       | 4 |
| Figure S1 Comparison between DEQAS data for 25(OH)D scheme and our lab results.....                  | 4 |
| Figure S2 Comparison between DEQAS data for 1,25(OH) <sub>2</sub> D scheme and our lab results ..... | 4 |

### S1. UPLC-MS/MS method for vitamin D<sub>3</sub> metabolites quantification

50  $\mu$ l mixture of deuterated internal standards (25(OH)D<sub>3</sub>-d<sub>6</sub>, 1,25(OH)<sub>2</sub>D<sub>3</sub>-d<sub>6</sub>, 3-epi-25(OH)D<sub>3</sub>-d<sub>3</sub>, 24,25(OH)<sub>2</sub>D<sub>3</sub>-d<sub>6</sub>) was added to 300  $\mu$ l of the serum, vortexed and equilibrated for 20 minutes. Then proteins were precipitated by adding 150  $\mu$ l of 0.05 M ZnSO<sub>4</sub> and 500  $\mu$ l of MeOH, followed by vortexing and centrifugation. Then the resulting liquid was loaded onto Agilent Bond Elut C18 (50 mg, 1ml) cartridges preconditioned with 1ml methanol and 1 ml water. The cartridges were subsequently washed with water followed by a 3:7 methanol/water mixture (1 ml of each), and samples were eluted with 2x300  $\mu$ l of methanol. The eluate was evaporated to dryness using vacuum centrifuge. Solid extract was derivatized by adding 30  $\mu$ l of 0.5 mg/ml solution of PTAD (4-phenyl-1,2,4-triazoline-3,5-dione) in acetonitrile. The reaction was quenched after 30 minutes by adding 90  $\mu$ l of 1:2 methanol/water mixture, transferred to the 384-well plate, and 80  $\mu$ l of it was injected into the Agilent 1290 Infinity II LC equipped with a 4-channel Flexible pump and Waters Acquity UPLC HSS T3 column (2.1 x 100 mm, particle size 1.8 mm). Gradient elution started with 37% acetonitrile (solvent A), 13% methanol (solvent B) and 50% 0.1% formic acid in water (solvent C). Then the following program was used: 0-13 min 37% A, 13% B, 50% C; 16 – 18 min 20% A, 20% B, 60% C; 18 – 20 min 100% B; 20 – 23 min 37% A, 13% B, 50% C. Detection was provided by AB Sciex Triple Quad 5500 mass-spectrometer using an ESI source with a capillary voltage of 5500 V and operating in MRM mode (Table S1);

**Table S1.** MRM transitions used for detection of the vitamin D metabolites

| Metabolite                                            | Transition type | Q1, Da | Q3, Da | DP, V | CE, V | CXP, V |
|-------------------------------------------------------|-----------------|--------|--------|-------|-------|--------|
| 24,25(OH) <sub>2</sub> D <sub>3</sub>                 | quantifier      | 592.3  | 298.2  | 145   | 27    | 33     |
|                                                       | qualifier       | 592.3  | 161.2  | 145   | 54    | 16     |
| 24,25(OH) <sub>2</sub> D <sub>3</sub> -d <sub>6</sub> | IS              | 598.5  | 298.2  | 155   | 27    | 31     |
| 1,25(OH) <sub>2</sub> D <sub>3</sub>                  | quantifier      | 592.3  | 314.2  | 130   | 26    | 36     |
|                                                       | qualifier       | 574.3  | 314.2  | 240   | 24    | 39     |
| 1,25(OH) <sub>2</sub> D <sub>3</sub> -d <sub>6</sub>  | IS              | 598.5  | 314.2  | 145   | 25    | 38     |
| 25(OH)D <sub>3</sub>                                  | quantifier*     | 558.4  | 161.1  | 225   | 65    | 18     |
| 3-epi-25(OH)D <sub>3</sub>                            | quantifier*     | 558.4  | 298.3  | 225   | 40    | 36     |
| 25(OH)D <sub>3</sub> -d <sub>6</sub>                  | IS              | 564.4  | 298.2  | 230   | 30    | 34     |
| 3-epi-25(OH)D <sub>3</sub> -d <sub>3</sub>            | IS              | 561.4  | 301.1  | 235   | 40    | 35     |
| 25(OH)D <sub>2</sub>                                  | quantifier      | 605.4  | 298.2  | 108   | 50    | 32     |
|                                                       | qualifier       | 605.4  | 161.1  | 108   | 42    | 19     |

\* Quantifiers for 25(OH)D<sub>3</sub> and 3-epi-25(OH)D<sub>3</sub> were used as qualifiers for each other

## S2. Method validation against DEQAS

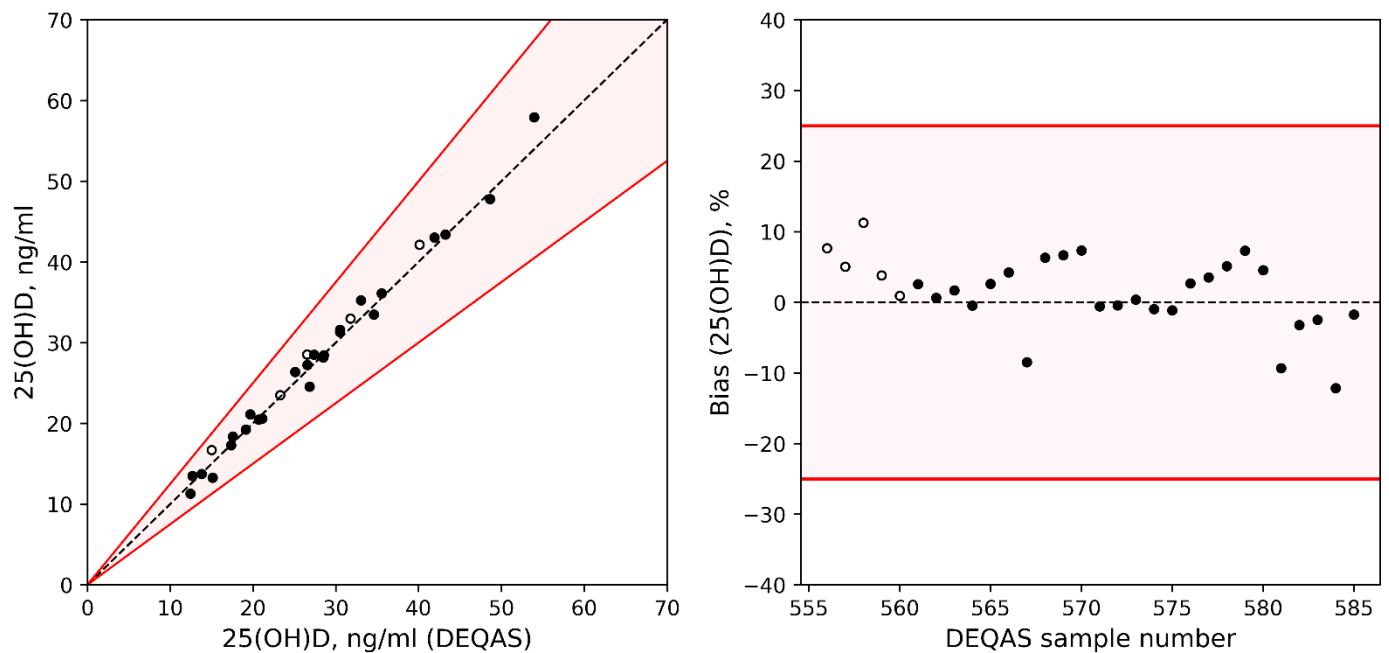

**Figure S1** Comparison between DEQAS data for 25(OH)D scheme and our lab results. Solid dots denote blind results submitted to DEQAS as lab 2388 prior to publication of the report. Red area indicates DEQAS acceptable range ( $\pm 25\%$  from the target value)

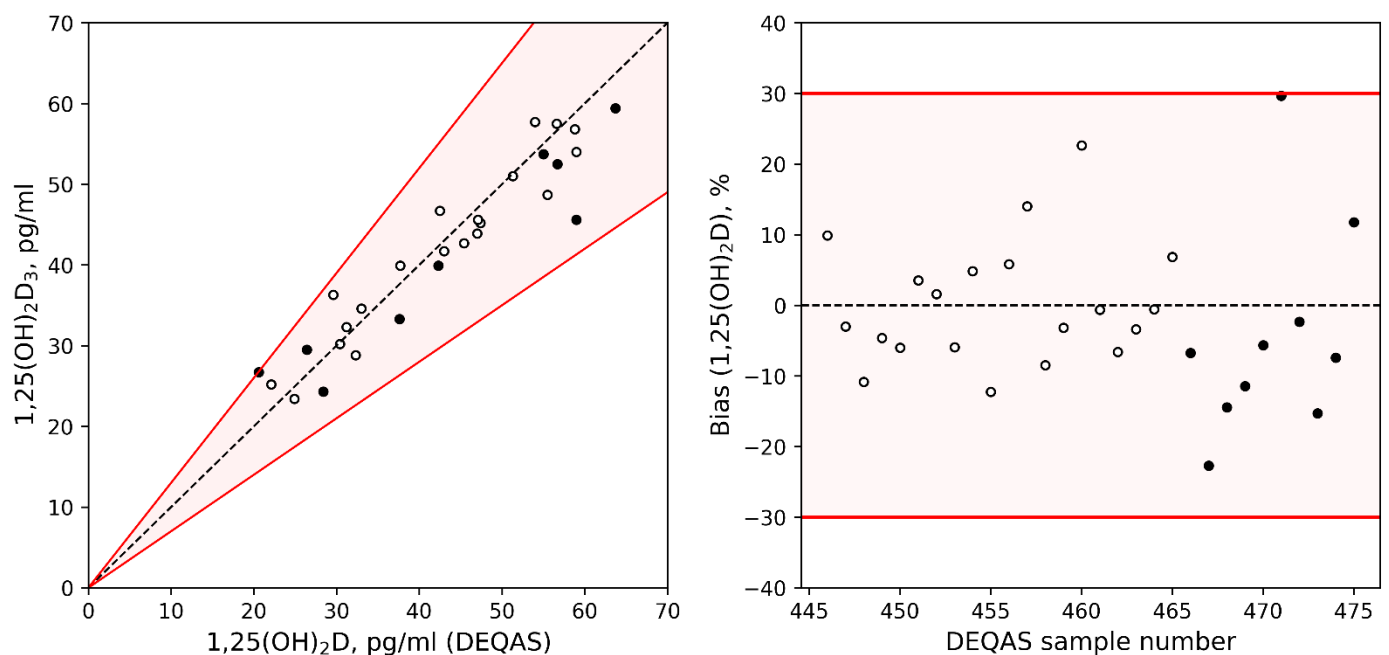

**Figure S2** Comparison between DEQAS data for 1,25(OH)<sub>2</sub>D scheme and our lab results. Solid dots denote blind results submitted to DEQAS as lab 2388 prior to publication of the report. Red area indicates DEQAS acceptable range ( $\pm 30\%$  from the target value)
